# Supplementary material for: Urolithin A improves mitochondrial health, reduces cartilage degeneration, and alleviates pain in osteoarthritis
Source: PubMed Central journal article supplement (PMC9381911; doi:10.1111/acel.13662), 2022-07-01

**A**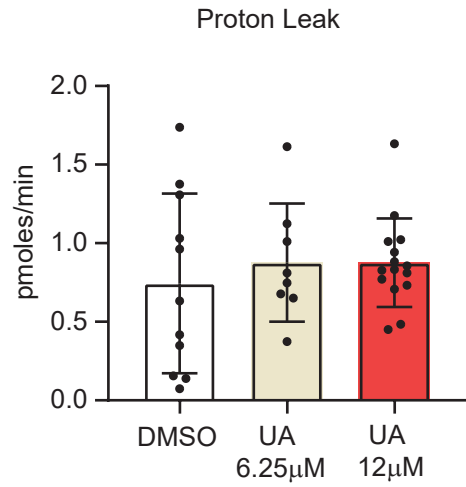**B**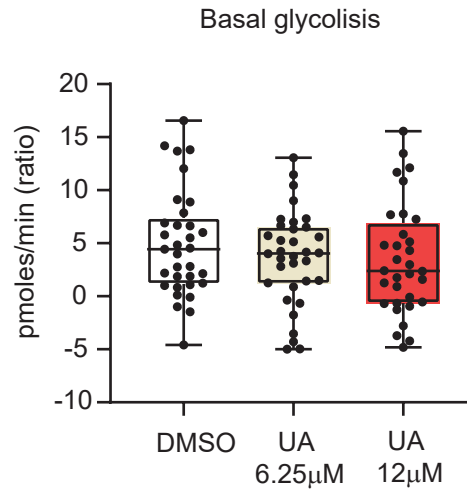**C**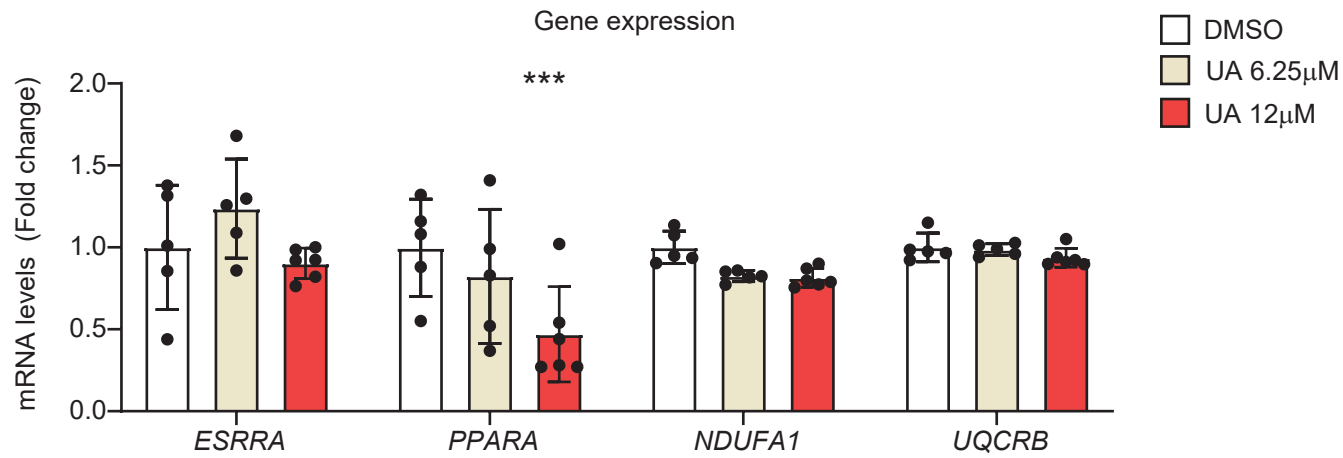

Supplement: ACEL-21-e13662-s003.pdf [file ACEL-21-e13662-s003.pdf]
